# Supplementary material for: A gender specific risk assessment of coronary heart disease based on physical examination data
Source: PubMed Central journal article supplement (PMC10390496; doi:10.1038/s41746-023-00887-8), 2023-07-31
Supplement: 41746_2023_887_MOESM1_ESM.pdf [file 41746_2023_887_MOESM1_ESM.pdf]

## Supplementary

**Supplementary Table 1.** Original physical examination features

| Category     | features  | Training cohort |              |                  | External validation cohort |             |                 |
|--------------|-----------|-----------------|--------------|------------------|----------------------------|-------------|-----------------|
|              |           | Total(n=680003) | CHD(n=39538) | Health(n=640465) | Total(n=95874)             | CHD(n=5707) | Health(n=90167) |
| Demographics | Gender    | 2.0(58.2%)      | 2.0(68.47%)  | 2.0(57.56%)      | 2.0(53.33%)                | 2.0(64.48%) | 2.0(52.63%)     |
|              |           | 1.0(41.8%)      | 1.0(31.53%)  | 1.0(42.44%)      | 1.0(46.67%)                | 1.0(35.52%) | 1.0(47.37%)     |
|              | Age       | 59.22±13.77     | 70.95±8.51   | 58.50±13.71      | 60.10±13.64                | 69.93±8.49  | 59.48±13.66     |
|              | Poverty   | 1.0(84.29%)     | 1.0(84.64%)  | 1.0(84.27%)      | 1.0(92.23%)                | 1.0(86.3%)  | 1.0(92.61%)     |
|              |           | 2.0(15.71%)     | 2.0(15.36%)  | 2.0(15.73%)      | 2.0(7.77%)                 | 2.0(13.7%)  | 2.0(7.39%)      |
|              | WHtR      | 0.51±0.06       | 0.55±0.07    | 0.51±0.06        | 0.52±0.06                  | 0.56±0.07   | 0.52±0.06       |
|              | Education | 2.0(49.79%)     | 2.0(44.04%)  | 2.0(50.15%)      | 2.0(49.19%)                | 2.0(48.08%) | 2.0(49.26%)     |
|              |           | 3.0(22.92%)     | 1.0(34.73%)  | 3.0(23.42%)      | 1.0(23.45%)                | 1.0(36.34%) | 1.0(22.63%)     |
|              |           | 1.0(20.38%)     | 3.0(14.84%)  | 1.0(19.5%)       | 3.0(20.41%)                | 3.0(12.18%) | 3.0(20.94%)     |
|              |           | 6.0(2.34%)      | 16.0(1.99%)  | 6.0(2.41%)       | 6.0(3.18%)                 | 16.0(1.24%) | 6.0(3.35%)      |
|              |           | 16.0(1.89%)     | 14.0(1.87%)  | 16.0(1.88%)      | 16.0(1.62%)                | 14.0(0.93%) | 16.0(1.65%)     |
|              |           | 13.0(1.11%)     | 6.0(1.23%)   | 13.0(1.12%)      | 13.0(0.93%)                | 6.0(0.53%)  | 13.0(0.96%)     |
|              |           | 14.0(0.94%)     | 13.0(0.9%)   | 14.0(0.88%)      | 14.0(0.79%)                | 13.0(0.46%) | 14.0(0.78%)     |
| 12.0(0.5%)   |           | 12.0(0.25%)     | 12.0(0.52%)  | 12.0(0.33%)      | 12.0(0.18%)                | 12.0(0.34%) |                 |

|             |            |                                            |                                             |                                             |                                            |                                            |                                            |              |
|-------------|------------|--------------------------------------------|---------------------------------------------|---------------------------------------------|--------------------------------------------|--------------------------------------------|--------------------------------------------|--------------|
| Vital signs | Occupation | 15.0(0.11%)\<br>11.0(0.02%)                | 15.0(0.12%)\<br>11.0(0.04%)                 | 15.0(0.11%)\<br>11.0(0.02%)                 | 15.0(0.06%)\<br>11.0(0.03%)                | 15.0(0.04%)\<br>11.0(0.04%)                | 15.0(0.06%)\<br>11.0(0.03%)                |              |
|             |            | 8.0(51.55%)\<br>5.0(29.7%)\<br>9.0(10.78%) | 8.0(54.21%)\<br>9.0(23.14%)\<br>5.0(10.75%) | 8.0(51.38%)\<br>5.0(30.87%)\<br>9.0(10.01%) | 5.0(69.91%)\<br>8.0(16.43%)\<br>9.0(7.01%) | 5.0(61.28%)\<br>8.0(20.9%)\<br>9.0(13.05%) | 5.0(70.46%)\<br>8.0(16.15%)\<br>9.0(6.63%) |              |
|             |            | 4.0(2.34%)\<br>2.0(2.1%)                   | 2.0(3.65%)\<br>6.0(3.04%)                   | 4.0(2.33%)\<br>2.0(2.0%)                    | 2.0(2.19%)\<br>4.0(1.9%)                   | 2.0(1.75%)\<br>4.0(0.93%)                  | 2.0(2.22%)\<br>4.0(1.96%)                  |              |
|             |            | 6.0(2.02%)\<br>3.0(0.76%)                  | 4.0(2.44%)\<br>3.0(1.87%)                   | 6.0(1.95%)\<br>3.0(0.69%)                   | 6.0(1.1%)\<br>3.0(0.76%)                   | 6.0(0.91%)\<br>3.0(0.7%)                   | 6.0(1.11%)\<br>3.0(0.76%)                  |              |
|             |            | 1.0(0.65%)                                 | 1.0(0.74%)                                  | 1.0(0.65%)                                  | 1.0(0.66%)                                 | 1.0(0.47%)                                 | 1.0(0.67%)                                 |              |
|             |            | 7.0(0.11%)                                 | 7.0(0.16%)                                  | 7.0(0.11%)                                  | 7.0(0.05%)                                 |                                            | 7.0(0.05%)                                 |              |
|             |            | PP(Pulse pressure)                         | 101.23±11.71                                | 109.63±13.64                                | 100.71±11.38                               | 100.03±11.13                               | 108.21±13.93                               | 99.51±10.72  |
|             |            | MSP                                        | 125.80±16.14                                | 138.72±19.18                                | 125.00±15.59                               | 124.18±15.38                               | 136.55±19.57                               | 123.39±14.73 |
|             |            | MDP                                        | 76.66±9.30                                  | 80.54±10.68                                 | 76.42±9.15                                 | 75.89±8.68                                 | 79.87±10.54                                | 75.63±8.49   |
|             |            | BT(body temperature)                       | 36.52±0.25                                  | 36.49±0.25                                  | 36.52±0.25                                 | 36.58±0.25                                 | 36.56±0.26                                 | 36.58±0.25   |
|             |            | PF(pulse frequency)                        | 70.63±11.06                                 | 72.47±13.65                                 | 70.52±10.87                                | 70.18±10.73                                | 72.82±13.57                                | 70.01±10.51  |
|             |            | HR(heart rate)                             | 70.58±11.06                                 | 72.45±13.73                                 | 70.47±10.86                                | 70.16±10.73                                | 72.79±13.60                                | 69.99±10.50  |

|                                                 |                                         |                                                           |                                                          |                                                           |                                                           |                                                           |                                                         |                                         |
|-------------------------------------------------|-----------------------------------------|-----------------------------------------------------------|----------------------------------------------------------|-----------------------------------------------------------|-----------------------------------------------------------|-----------------------------------------------------------|---------------------------------------------------------|-----------------------------------------|
| Internal<br>checkup<br>&<br>External<br>checkup | RR(respirator<br>y rate)                | 18.56±1.47                                                | 18.48±1.45                                               | 18.57±1.47                                                | 18.61±1.23                                                | 18.67±1.15                                                | 18.60±1.24                                              |                                         |
|                                                 | DFAP(dorsal<br>foot artery<br>pulsates) | 2.0(51.95%)\<br>1.0(48.01%)\<br>4.0(0.03%)\<br>8.0(0.01%) | 1.0(54.43%)\<br>2.0(45.13%)\<br>4.0(0.3%)\<br>8.0(0.15%) | 2.0(52.37%)\<br>1.0(47.61%)\<br>4.0(0.01%)\<br>8.0(0.01%) | 2.0(74.04%)\<br>1.0(25.92%)\<br>4.0(0.02%)\<br>8.0(0.02%) | 2.0(68.42%)\<br>1.0(31.14%)\<br>4.0(0.32%)\<br>8.0(0.12%) | 2.0(74.4%)\<br>1.0(25.59%)\<br>8.0(0.01%)\<br>4.0(0.0%) |                                         |
|                                                 |                                         | Symptom                                                   | 0.0(91.25%)\<br>1.0(8.75%)                               | 0.0(84.3%)\<br>1.0(15.7%)                                 | 0.0(91.68%)\<br>1.0(8.32%)                                | 0.0(87.82%)\<br>1.0(12.18%)                               | 0.0(76.87%)\<br>1.0(23.13%)                             | 0.0(88.51%)\<br>1.0(11.49%)             |
|                                                 |                                         | RH antibody                                               | 3.0(93.65%)\<br>1.0(5.77%)<br>2.0(0.57%)                 | 3.0(93.26%)\<br>1.0(6.06%)<br>2.0(0.67%)                  | 3.0(93.68%)\<br>1.0(5.75%)<br>2.0(0.57%)                  | 3.0(99.03%)\<br>1.0(0.73%)<br>2.0(0.24%)                  | 3.0(99.51%)\<br>1.0(0.3%)<br>2.0(0.19%)                 | 3.0(99.0%)\<br>1.0(0.76%)<br>2.0(0.24%) |
|                                                 |                                         |                                                           | AM(abdomin<br>al mass)                                   | 1.0(99.92%)\<br>2.0(0.08%)                                | 1.0(99.93%)\<br>2.0(0.07%)                                | 1.0(99.92%)\<br>2.0(0.08%)                                | 1.0(99.98%)\<br>2.0(0.02%)                              | 1.0(99.96%)\<br>2.0(0.04%)              |
|                                                 | AT(abdominal<br>tenderness)             |                                                           | 1.0(99.17%)<br>2.0(0.83%)                                | 1.0(98.35%)<br>2.0(1.65%)                                 | 1.0(99.22%)<br>2.0(0.78%)                                 | 1.0(98.94%)<br>2.0(1.06%)                                 | 1.0(97.16%)<br>2.0(2.84%)                               | 1.0(99.05%)<br>2.0(0.95%)               |
|                                                 | CS(cardiac so<br>uffle)                 | 1.0(99.92%)\<br>2.0(0.08%)                                | 1.0(99.56%)\<br>2.0(0.44%)                               | 1.0(99.94%)\<br>2.0(0.06%)                                | 1.0(99.86%)\<br>2.0(0.14%)                                | 1.0(99.46%)\<br>2.0(0.54%)                                | 1.0(99.88%)\<br>2.0(0.12%)                              |                                         |
|                                                 | LBS(Lung<br>breath<br>sounds)           | 1.0(99.74%)\<br>2.0(0.26%)                                | 1.0(99.04%)\<br>2.0(0.96%)                               | 1.0(99.79%)\<br>2.0(0.21%)                                | 1.0(99.41%)\<br>2.0(0.59%)                                | 1.0(98.23%)\<br>2.0(1.77%)                                | 1.0(99.49%)\<br>2.0(0.51%)                              |                                         |
|                                                 |                                         | Pharyngeal                                                | 1.0(99.8%)\<br>                                          | 1.0(99.73%)\<br>                                          | 1.0(99.81%)\<br>                                          | 1.0(99.79%)\<br>                                          | 1.0(99.7%)\<br>                                         | 1.0(99.8%)\<br>                         |

|                    |              |              |              |              |              |              |
|--------------------|--------------|--------------|--------------|--------------|--------------|--------------|
|                    | 0.0(0.15%)\  | 0.0(0.21%)\  | 0.0(0.15%)\  | 0.0(0.13%)\  | 0.0(0.23%)\  | 0.0(0.12%)\  |
|                    | 2.0(0.03%)\  | 2.0(0.04%)\  | 2.0(0.03%)\  | 4.0(0.04%)\  | 2.0(0.05%)\  | 4.0(0.04%)\  |
|                    | 4.0(0.02%)   | 4.0(0.02%)   | 4.0(0.02%)   | 2.0(0.04%)   | 4.0(0.02%)   | 2.0(0.04%)   |
| Vision             | 4.76±0.23    | 4.63±0.23    | 4.77±0.23    | 4.78±0.24    | 4.68±0.23    | 4.79±0.23    |
| Dentition          | 0.0(54.83%)\ | 1.0(77.53%)\ | 0.0(56.83%)\ | 0.0(51.9%)\  | 1.0(76.87%)\ | 0.0(51.9%)\  |
|                    | 1.0(45.17%)  | 0.0(22.47%)  | 1.0(43.17%)  | 1.0(48.1%)   | 0.0(23.13%)  | 1.0(48.1%)   |
| Hearing            | 1.0(98.89%)\ | 1.0(96.35%)\ | 1.0(99.05%)\ | 1.0(98.02%)\ | 1.0(96.32%)\ | 1.0(98.02%)\ |
|                    | 2.0(1.11%)   | 2.0(3.65%)   | 2.0(0.95%)   | 2.0(1.98%)   | 2.0(3.68%)   | 2.0(1.98%)   |
| MF(motor function) | 1.0(99.89%)\ | 1.0(99.69%)\ | 1.0(99.9%)\  | 1.0(99.87%)\ | 1.0(99.68%)\ | 1.0(99.87%)\ |
|                    | 2.0(0.11%)   | 2.0(0.31%)   | 2.0(0.1%)    | 2.0(0.13%)   | 2.0(0.32%)   | 2.0(0.13%)   |
| Skin               | 1.0(99.09%)\ | 1.0(97.09%)\ | 1.0(99.22%)\ | 1.0(99.9%)\  | 1.0(99.72%)\ | 1.0(99.9%)\  |
|                    | 64.0(0.53%)\ | 64.0(2.19%)\ | 64.0(0.43%)\ | 64.0(0.04%)\ | 64.0(0.25%)\ | 64.0(0.04%)\ |
|                    | 32.0(0.36%)\ | 32.0(0.68%)\ | 32.0(0.34%)\ | 32.0(0.02%)\ | 8.0(0.02%)\  | 32.0(0.02%)\ |
|                    | 4.0(0.01%)\  | 8.0(0.02%)\  | 4.0(0.01%)\  | 4.0(0.02%)\  | 2.0(0.02%)   | 4.0(0.02%)\  |
|                    | 2.0(0.0%)\   | 4.0(0.02%)\  | 2.0(0.0%)\   | 2.0(0.01%)\  |              | 2.0(0.01%)\  |
|                    | 8.0(0.0%)\   | 2.0(0.01%)   | 16.0(0.0%)\  | 8.0(0.01%)   |              | 8.0(0.01%)   |
|                    | 16.0(0.0%)   |              | 8.0(0.0%)    |              |              |              |
| Sclera             | 1.0(99.99%)\ | 1.0(99.97%)\ | 1.0(99.99%)\ | 1.0(99.98%)\ | 1.0(99.95%)\ | 1.0(99.98%)\ |
|                    | 2.0(0.0%)\   | 4.0(0.01%)\  | 2.0(0.0%)\   | 2.0(0.01%)\  | 2.0(0.04%)\  | 2.0(0.01%)\  |
|                    | 8.0(0.0%)\   | 8.0(0.01%)\  | 8.0(0.0%)\   | 4.0(0.01%)   | 4.0(0.02%)   | 4.0(0.01%)   |

|                               |              |              |              |              |              |              |
|-------------------------------|--------------|--------------|--------------|--------------|--------------|--------------|
|                               | 4.0(0.0%)    | 2.0(0.01%)   | 4.0(0.0%)    |              |              |              |
| LG(lymph gland)               | 1.0(99.94%)\ | 1.0(99.96%)\ | 1.0(99.94%)\ | 1.0(99.98%)\ | 1.0(99.98%)\ | 1.0(99.98%)\ |
|                               | 2.0(0.03%)\  | 8.0(0.02%)\  | 2.0(0.04%)\  | 8.0(0.01%)\  | 2.0(0.02%)   | 8.0(0.01%)\  |
|                               | 8.0(0.02%)\  | 2.0(0.01%)\  | 8.0(0.02%)\  | 2.0(0.01%)\  |              | 2.0(0.01%)\  |
|                               | 4.0(0.0%)    | 4.0(0.0%)    | 4.0(0.0%)    | 4.0(0.0%)    |              | 4.0(0.0%)    |
| PBC(Pulmonary barrel chest)   | 1.0(99.81%)\ | 1.0(98.75%)\ | 1.0(99.88%)\ | 1.0(99.58%)\ | 1.0(98.04%)\ | 1.0(99.58%)\ |
|                               | 2.0(0.19%)   | 2.0(1.25%)   | 2.0(0.12%)   | 2.0(0.42%)   | 2.0(1.96%)   | 2.0(0.42%)   |
| LR(Lung rale)                 | 1.0(99.86%)\ | 1.0(99.43%)\ | 1.0(99.89%)\ | 1.0(99.82%)\ | 1.0(99.3%)\  | 1.0(99.82%)\ |
|                               | 2.0(0.06%)\  | 4.0(0.3%)\   | 2.0(0.05%)\  | 2.0(0.11%)\  | 4.0(0.33%)\  | 2.0(0.11%)\  |
|                               | 4.0(0.06%)\  | 2.0(0.2%)\   | 4.0(0.04%)\  | 4.0(0.05%)\  | 2.0(0.3%)\   | 4.0(0.05%)\  |
|                               | 8.0(0.01%)   | 8.0(0.07%)   | 8.0(0.01%)   | 8.0(0.01%)   | 8.0(0.07%)   | 8.0(0.01%)   |
| RH(rhythm of the heart)       | 1.0(95.87%)\ | 1.0(92.41%)\ | 1.0(96.09%)\ | 1.0(97.4%)\  | 1.0(93.99%)\ | 1.0(97.4%)\  |
|                               | 2.0(3.98%)\  | 2.0(6.41%)\  | 2.0(3.83%)\  | 2.0(2.49%)\  | 2.0(5.33%)\  | 2.0(2.49%)\  |
|                               | 4.0(0.14%)   | 4.0(1.18%)   | 4.0(0.08%)   | 4.0(0.11%)   | 4.0(0.68%)   | 4.0(0.11%)   |
| ELE(edema of lower extremity) | 1.0(99.85%)\ | 1.0(98.78%)\ | 1.0(99.91%)\ | 1.0(99.51%)\ | 1.0(97.98%)\ | 1.0(99.51%)\ |
|                               | 8.0(0.1%)\   | 8.0(0.98%)\  | 8.0(0.04%)\  | 8.0(0.25%)\  | 8.0(1.42%)\  | 8.0(0.25%)\  |
|                               | 2.0(0.04%)\  | 2.0(0.17%)\  | 2.0(0.03%)\  | 4.0(0.12%)\  | 4.0(0.4%)\   | 4.0(0.12%)\  |
|                               | 4.0(0.02%)   | 4.0(0.07%)   | 4.0(0.01%)   | 2.0(0.12%)   | 2.0(0.19%)   | 2.0(0.12%)   |
| AD(anus dre)                  | 1.0(99.99%)\ | 1.0(99.98%)\ | 1.0(99.99%)\ | 1.0(100.0%)\ | 1.0(100.0%)  | 1.0(100.0%)\ |
|                               | 16.0(0.0%)\  | 16.0(0.01%)\ | 16.0(0.0%)\  | 16.0(0.0%)   |              | 16.0(0.0%)   |

|                   |                            |                                                                         |                                                                         |                                                                         |                                                                         |                                                                        |                                                                         |                                                                        |
|-------------------|----------------------------|-------------------------------------------------------------------------|-------------------------------------------------------------------------|-------------------------------------------------------------------------|-------------------------------------------------------------------------|------------------------------------------------------------------------|-------------------------------------------------------------------------|------------------------------------------------------------------------|
| Laboratory values |                            | 2.0(0.0%)\<br>4.0(0.0%)\<br>8.0(0.0%)                                   | 2.0(0.01%)\<br>4.0(0.0%)                                                | 2.0(0.0%)\<br>4.0(0.0%)\<br>8.0(0.0%)                                   |                                                                         |                                                                        |                                                                         |                                                                        |
|                   | FBG(fasting blood-glucose) | 5.39±1.31                                                               | 6.21±2.40                                                               | 5.34±1.20                                                               | 5.41±1.39                                                               | 6.17±2.58                                                              | 5.36±1.26                                                               |                                                                        |
|                   | Hemoglobin                 | 133.76±17.01                                                            | 132.04±15.63                                                            | 133.86±17.09                                                            | 134.36±15.79                                                            | 132.43±15.10                                                           | 134.48±15.83                                                            |                                                                        |
|                   | Hemameba                   | 6.13±2.05                                                               | 6.25±2.01                                                               | 6.13±2.06                                                               | 5.99±1.78                                                               | 6.21±1.85                                                              | 5.97±1.78                                                               |                                                                        |
|                   | PLT(Platelet count)        | 209.43±63.81                                                            | 200.04±63.98                                                            | 210.01±63.76                                                            | 206.64±56.64                                                            | 203.59±58.51                                                           | 206.83±56.52                                                            |                                                                        |
|                   | PRO(protein)               | 0.0(93.87%)\<br>1.0(5.16%)\<br>2.0(0.73%)\<br>3.0(0.21%)\<br>4.0(0.03%) | 0.0(87.98%)\<br>1.0(9.43%)\<br>2.0(2.12%)\<br>3.0(0.43%)\<br>4.0(0.03%) | 0.0(94.23%)\<br>1.0(4.9%)\<br>2.0(0.64%)\<br>3.0(0.2%)\<br>4.0(0.03%)   | 0.0(94.65%)\<br>1.0(4.37%)\<br>2.0(0.55%)\<br>3.0(0.42%)\<br>4.0(0.01%) | 0.0(88.82%)\<br>1.0(8.73%)\<br>2.0(1.45%)\<br>3.0(1.0%)                | 0.0(94.65%)\<br>1.0(4.37%)\<br>2.0(0.55%)\<br>3.0(0.42%)\<br>4.0(0.01%) |                                                                        |
|                   |                            | UGLU (urine glucose)                                                    | 0.0(97.61%)\<br>1.0(1.75%)\<br>3.0(0.3%)\<br>2.0(0.28%)\<br>4.0(0.06%)  | 0.0(94.83%)\<br>1.0(2.78%)\<br>3.0(1.47%)\<br>2.0(0.69%)\<br>4.0(0.23%) | 0.0(97.78%)\<br>1.0(1.69%)\<br>2.0(0.25%)\<br>3.0(0.23%)\<br>4.0(0.05%) | 0.0(98.74%)\<br>1.0(0.72%)\<br>3.0(0.27%)\<br>2.0(0.2%)\<br>4.0(0.07%) | 0.0(95.64%)\<br>1.0(1.59%)\<br>3.0(1.58%)\<br>2.0(0.86%)\<br>4.0(0.33%) | 0.0(98.74%)\<br>1.0(0.72%)\<br>3.0(0.27%)\<br>2.0(0.2%)\<br>4.0(0.07%) |

|                                              |             |             |             |             |             |             |
|----------------------------------------------|-------------|-------------|-------------|-------------|-------------|-------------|
| UAB(urine acetone bodies)                    | 0.0(97.61%) | 0.0(96.96%) | 0.0(97.65%) | 0.0(97.81%) | 0.0(97.49%) | 0.0(97.81%) |
|                                              | 1.0(1.84%)  | 1.0(2.47%)  | 1.0(1.81%)  | 1.0(1.74%)  | 1.0(2.03%)  | 1.0(1.74%)  |
|                                              | 2.0(0.37%)  | 2.0(0.34%)  | 2.0(0.37%)  | 2.0(0.33%)  | 2.0(0.28%)  | 2.0(0.33%)  |
|                                              | 3.0(0.14%)  | 3.0(0.16%)  | 3.0(0.13%)  | 3.0(0.1%)   | 3.0(0.19%)  | 3.0(0.1%)   |
|                                              | 4.0(0.04%)  | 4.0(0.07%)  | 4.0(0.04%)  | 4.0(0.01%)  |             | 4.0(0.01%)  |
| UOB(urine occult blood)                      | 0.0(88.84%) | 0.0(83.94%) | 0.0(89.15%) | 0.0(89.65%) | 0.0(86.3%)  | 0.0(89.65%) |
|                                              | 1.0(7.56%)  | 1.0(11.5%)  | 1.0(7.31%)  | 1.0(6.4%)   | 1.0(8.83%)  | 1.0(6.4%)   |
|                                              | 2.0(2.07%)  | 2.0(2.9%)   | 2.0(2.02%)  | 2.0(2.23%)  | 2.0(2.77%)  | 2.0(2.23%)  |
|                                              | 3.0(1.5%)   | 3.0(1.66%)  | 3.0(1.49%)  | 3.0(1.69%)  | 3.0(2.1%)   | 3.0(1.69%)  |
|                                              | 4.0(0.04%)  | 4.0(0.01%)  | 4.0(0.04%)  | 4.0(0.03%)  |             | 4.0(0.03%)  |
| OBS(occult blood in stool)                   | 0.0(99.96%) | 0.0(99.99%) | 0.0(99.96%) | 0.0(99.99%) | 0.0(100.0%) | 0.0(99.99%) |
|                                              | 1.0(0.04%)  | 1.0(0.01%)  | 1.0(0.04%)  | 1.0(0.01%)  |             | 1.0(0.01%)  |
| SGPT(serum glutamic pyruvic transaminase)    | 22.73±12.41 | 22.54±12.06 | 22.74±12.43 | 23.37±12.77 | 23.05±12.64 | 23.39±12.78 |
| SGOT(serum glutamic oxalacetic transaminase) | 25.68±10.28 | 25.39±9.83  | 25.70±10.30 | 25.38±9.48  | 25.44±9.39  | 25.37±9.49  |
| TBil(total bilirubin)                        | 12.36±5.93  | 12.66±5.80  | 12.34±5.93  | 11.83±5.56  | 12.09±5.50  | 11.82±5.56  |

|                                                    |                            |                             |                            |                             |                             |                             |
|----------------------------------------------------|----------------------------|-----------------------------|----------------------------|-----------------------------|-----------------------------|-----------------------------|
| SC(serum creatinine)                               | 74.34±18.98                | 76.41±20.22                 | 74.21±18.89                | 73.18±17.60                 | 74.91±19.79                 | 73.07±17.45                 |
| BUN(blood urea nitrogen)                           | 5.57±2.61                  | 5.88±2.42                   | 5.55±2.62                  | 5.75±2.31                   | 5.99±2.17                   | 5.73±2.32                   |
| TC(total cholesterol)                              | 4.93±1.37                  | 5.08±1.28                   | 4.92±1.38                  | 5.05±1.14                   | 5.22±1.17                   | 5.04±1.14                   |
| Triglyceride                                       | 1.69±1.52                  | 1.82±1.58                   | 1.69±1.51                  | 1.64±1.48                   | 1.87±1.60                   | 1.63±1.47                   |
| SLDLDC(Serum low density lipoprotein cholesterol)  | 2.64±1.00                  | 2.75±1.08                   | 2.64±0.99                  | 2.95±0.94                   | 3.05±1.04                   | 2.95±0.93                   |
| SHDLDC(Serum high density lipoprotein cholesterol) | 1.61±0.86                  | 1.56±0.72                   | 1.61±0.87                  | 1.63±0.64                   | 1.56±0.59                   | 1.64±0.64                   |
| HBsAg                                              | 0.0(99.88%)\<br>1.0(0.12%) | 0.0(99.97%)\<br>1.0(0.03%)  | 0.0(99.88%)\<br>1.0(0.12%) | 0.0(99.98%)\<br>1.0(0.02%)  | 0.0(100.0%)                 | 0.0(99.98%)\<br>1.0(0.02%)  |
| ECG                                                | 0.0(53.8%)\<br>1.0(46.2%)  | 1.0(67.31%)\<br>0.0(32.69%) | 0.0(55.1%)\<br>1.0(44.9%)  | 0.0(52.39%)\<br>1.0(47.61%) | 1.0(74.26%)\<br>0.0(25.74%) | 0.0(52.39%)\<br>1.0(47.61%) |

Gender: 2.0(female)\1.0(male)

AM(abdominal mass): 1.0(normal)\2.0(abnormal)



---

AT(abdominal tenderness): 1.0(normal)\2.0(abnormal)

CS(cardiac souffle): 1.0(normal)\2.0(abnormal)

LBS(lung breath sounds): 1.0(normal)\2.0(abnormal)

ECG: 0.0(normal)\1.0(abnormal)

Poverty: 1.0(no)\2.0(yes)

RHA (RH antibody): 3.0(unknown)\1.0(positive)\2.0(negative)

Education: 2.0(primary school)\3.0(junior middle school)\1.0(Illiterate and semi-literate)\6.0(unknown)\16.0(high school)\13.0(Colleges and colleges)\14.0(Specialized secondary schools)\12.0(Bachelor's degree)\15.0(Technical school)\11.0(Graduate students)

Occupation: 8.0(Other practitioners who are not suitable for classification)\5.0(Agricultural production personnel)\9.0(No professional personnel)\4.0(Service personnel)\2.0(Professional and technical personnel)\6.0(Production and transportation personnel)\3.0(Administrative personnel)\1.0(Personnel of state organs)\7.0(soldiers)

DFAP(dorsal foot artery pulsates): 2.0(touch bilateral symmetry)\1.0(untouched)\4.0(touch the left side weak or disappear)\8.0(touch the right side weak or disappear)

Hearing: 1.0(normal)\2.0(abnormal)

MF(motor function):1.0(normal)\2.0(abnormal)

Skin: 1.0(normal)\64.0(other)\32.0(Pigmentation)\4.0(pale)\2.0(hot flashes)\8.0(cyanosis)\16.0(yellow dye)

Sclera: 1.0(normal)\2.0(yellow dye)\8.0(other)\4.0(congestion)

LG(lymph gland): 1.0(untouched)\2.0(Supraclavicular)\4.0(axillary)\8.0(other)

PBC(Pulmonary barrel chest): 1.0(normal)\2.0(abnormal)

LR(Lung rale): 1.0(normal)\2.0(dry rales)\4.0(Wet rales)\8.0(other)

RH(rhythm of the heart): 1.0(normal)\2.0(arrhythmia)\4.0(absolutely irregular heart rate)

ELE(edema of lower extremity): 1.0(normal)\8.0(bilateral symmetry)\2.0(unilateral)\4.0(bilateral asymmetry)

---

AD(anus dre): 1.0(normal)\16.0(other)\2.0(tenderness)\4.0(bag piece)\8.0(Prostate abnormalities)

PRO(protein): 0.0(-)\1.0(1+)\2.0(2+)\3.0(3+)\4.0(4+)

UGLU (urine glucose): 0.0(-)\1.0(1+)\2.0(2+)\3.0(3+)\4.0(4+)

UAB(urine acetone bodies): 0.0(-)\1.0(1+)\2.0(2+)\3.0(3+)\4.0(4+)

UOB(urine occult blood): 0.0(-)\1.0(1+)\2.0(2+)\3.0(3+)\4.0(4+)

OBS(occult blood in stool): 0.0(normal)\1.0(abnormal)

HBsAg: 0.0(normal)\1.0(abnormal)

Symptom: 0.0(normal)\1.0(Palpitation, chest tightness, dizziness, headache)

DH(dietary habits): 0.0(normal)\1.0(like Salt, oil, sugar)

Dentition: 0.0(normal)\1.0(Dental absence, caries and dentures)

---

**Supplementary Table 2.** Statistical description of lifestyle habits

---

| features | Total(n=775590) | CHD(n=45242) | Health(n=730348) |
|----------|-----------------|--------------|------------------|
| ST       | 1.0(72.29%)\    | 1.0(80.27%)\ | 1.0(71.79%)\     |
|          | 2.0(2.27%)\     | 2.0(6.8%)\   | 2.0(1.2%)\       |
|          | 3.0(25.43%)     | 3.0(12.89%)  | 3.0(26.21%)      |
| DF       | 1.0(77.66%)\    | 1.0(83.64%)\ | 1.0(77.29%)\     |
|          | 2.0(13.03%)\    | 2.0(10.57%)\ | 2.0(13.18%)\     |
|          | 3.0(9.21%)      | 3.0(5.78%)   | 3.0(9.42%)       |
| EF       | 1.0(8.58%)\     | 1.0(20.14%)\ | 1.0(7.9%)\       |
|          | 2.0(2.75%)\     | 2.0(4.9%)\   | 2.0(2.6%)\       |
|          | 3.0(2.15%)\     | 3.0(3.5%)\   | 3.0(2.1%)\       |
|          | 4.0(86.52%)     | 4.0(71.35%)  | 4.0(87.45%)      |

---

ST(smoking status): 1.0(Never smoked)\3.0(smoking)\2.0(smoking cessation)

DF(drinking frequency): 1.0(never)\2.0(occasionally)\3.0 (often)

EF(exercise frequency): 4.0(Don't exercise)\1.0(each day)\2.0(More than once a week)\  
3.0(once in a while)

---

**Supplementary Table 3. Statistical description of comorbidities**

---

| features | Total(n=828884)            | CHD(n=47947)                | Health(n=780938)           |
|----------|----------------------------|-----------------------------|----------------------------|
| CD       | 1.0(99.62%)\<br>2.0(0.38%) | 1.0(94.92%)\<br>2.0(5.08%)  | 1.0(99.91%)\<br>2.0(0.09%) |
| KD       | 1.0(95.33%)\<br>2.0(4.67%) | 1.0(80.16%)\<br>2.0(19.84%) | 1.0(96.26%)\<br>2.0(3.74%) |
| VD       | 1.0(99.97%)\<br>2.0(0.03%) | 1.0(99.67%)\<br>2.0(0.33%)  | 1.0(99.99%)\<br>2.0(0.01%) |
| ED       | 1.0(99.50%)\<br>2.0(0.50%) | 1.0(98.15%)\<br>2.0(1.85%)  | 1.0(99.58%)\<br>2.0(0.42%) |

---

CD (Cerebrovascular diseases): 1.0(no)\2.0(yes)

KD (Kidney diseases): 1.0(no)\2.0(yes)

VD (Vascular diseases): 1.0(no)\2.0(yes)

ED (Eye diseases): 1.0(no)\2.0(yes)

**Supplementary Table 4.** Feature selection step 1: Single feature AUC and AUC under IFS strategy.

|           | Features          | Features AUC       | IFS 5V AUC         |
|-----------|-------------------|--------------------|--------------------|
| 1         | Age               | 0.778286196        | 0.778286196        |
| 2         | MSP               | 0.715961006        | 0.809631782        |
| 3         | WHtR              | 0.704078943        | 0.835286674        |
| 4         | PP                | 0.696911738        | 0.834569373        |
| 5         | Dentition         | 0.671804773        | 0.863496387        |
| 6         | Vision            | 0.669264054        | 0.863939968        |
| 7         | FBG               | 0.626975536        | 0.870013451        |
| 8         | MDP               | 0.61703819         | 0.870013376        |
| 9         | ECG               | 0.612073987        | 0.873955609        |
| 10        | Gender            | 0.554536874        | 0.875457492        |
| 11        | BUN               | 0.554059241        | 0.875514288        |
| 12        | PLT               | 0.550684515        | 0.876021052        |
| 13        | Triglyceride      | 0.547785148        | 0.875842338        |
| 14        | TC                | 0.539414541        | 0.874853324        |
| 15        | Symptom           | 0.536911335        | 0.876272366        |
| 16        | BT                | 0.535221271        | 0.876577335        |
| <b>17</b> | <b>Hemoglobin</b> | <b>0.535015801</b> | <b>0.876585884</b> |
| 18        | DFAP              | 0.53302596         | 0.873471973        |
| 19        | SLDLC             | 0.531494701        | 0.873055903        |
| 20        | PRO               | 0.531493057        | 0.873506233        |
| 21        | HR                | 0.531273521        | 0.873620037        |
| 22        | PF                | 0.531261359        | 0.873611686        |
| 23        | SHDLC             | 0.525894773        | 0.873739601        |
| 24        | UOB               | 0.525543511        | 0.873784689        |
| 25        | Hemameba          | 0.522368555        | 0.873671521        |
| 26        | RR                | 0.521350455        | 0.87394909         |
| 27        | SC                | 0.52081514         | 0.873955998        |
| 28        | RH                | 0.518643484        | 0.874505856        |
| 29        | DH                | 0.518473374        | 0.875548524        |
| 30        | TBil              | 0.518369333        | 0.875556639        |
| 31        | UGLU              | 0.514922387        | 0.875576937        |
| 32        | Hearing           | 0.513511939        | 0.875690961        |
| 33        | Skin              | 0.51066118         | 0.876316913        |

---

---

|    |            |             |             |
|----|------------|-------------|-------------|
| 34 | SGOT       | 0.508833463 | 0.876441268 |
| 35 | ELE        | 0.505678073 | 0.876890197 |
| 36 | PBC        | 0.505625018 | 0.877593437 |
| 37 | AT         | 0.504312824 | 0.877695609 |
| 38 | LBS        | 0.503711487 | 0.877763438 |
| 39 | UAB        | 0.503393203 | 0.877704304 |
| 40 | SGPT       | 0.502307701 | 0.878007455 |
| 41 | LR         | 0.502292918 | 0.878047104 |
| 42 | CS         | 0.501903079 | 0.878196336 |
| 43 | MF         | 0.501072213 | 0.878185997 |
| 44 | HBsAg      | 0.500478416 | 0.878179715 |
| 45 | Pharyngeal | 0.500233861 | 0.87818843  |
| 46 | Sclera     | 0.500122242 | 0.878195907 |
| 47 | OBS        | 0.500120229 | 0.878190179 |
| 48 | AD         | 0.500060414 | 0.878189793 |
| 49 | LG         | 0.499927562 | 0.878189792 |
| 50 | AM         | 0.499677916 | 0.878152428 |
| 51 | RHA        | 0.483234175 | 0.876503746 |

---

---

**Supplementary Table 5.** Feature selection step 3: GINI impurity and AUC in IFS strategy.

|           | Features     | GINI impurity      | IFS_5V_AUC        |
|-----------|--------------|--------------------|-------------------|
| 1         | Dentition    | 0.35149533         | 0.67180477        |
| 2         | Age          | 0.29890698         | 0.83079147        |
| 3         | MSP          | 0.062131204        | 0.85495388        |
| 4         | WHtR         | 0.061418686        | 0.87299490        |
| 5         | ECG          | 0.060486           | 0.87647083        |
| 6         | Symptom      | 0.045007918        | 0.87790954        |
| 7         | Gender       | 0.040363356        | 0.87971195        |
| 8         | FBG          | 0.026229462        | 0.88346403        |
| 9         | BT           | 0.011819883        | 0.88373019        |
| 10        | PLT          | 0.01094614         | 0.88441608        |
| <b>11</b> | <b>BUN</b>   | <b>0.010596671</b> | <b>0.88508630</b> |
| 12        | TC           | 0.010409742        | 0.88508349        |
| 13        | Triglyceride | 0.009188587        | 0.88463225        |

---

**Supplementary Table 6.** Univariate analysis for the physical examination features in training dataset

| Category             | Features  | Male                        |                             |                             |         | Female                      |                             |                             |         |
|----------------------|-----------|-----------------------------|-----------------------------|-----------------------------|---------|-----------------------------|-----------------------------|-----------------------------|---------|
|                      |           | Total<br>(n=284257)         | CHD<br>(n=12466)            | Health<br>(n=271791)        | P-value | Total<br>(n=395746)         | CHD<br>(n=27072)            | Health<br>(n=368674)        | P-value |
| Demographics         | Age       | 60.15±13.86                 | 71.44±8.33                  | 59.63±13.84                 | <0.001  | 58.56±13.67                 | 70.72±8.59                  | 57.67±13.55                 | <0.001  |
|                      | WHtR      | 0.49±0.05                   | 0.53±0.06                   | 0.49±0.05                   | <0.001  | 0.52±0.06                   | 0.56±0.07                   | 0.52±0.06                   | <0.001  |
| Vital signs          | MSP       | 127.41±15.76                | 138.01±18.7                 | 126.92±15.4                 | <0.001  | 124.64±16.31                | 139.04±19.3                 | 123.59±15.5                 | <0.001  |
|                      | Symptom   | 0.0(91.27%)\<br>1.0(8.73%)  | 0.0(84.69%)\<br>1.0(15.31%) | 0.0(91.57%)\<br>1.0(8.43%)  | <0.001  | 0.0(91.24%)\1<br>.0(8.76%)  | 0.0(84.12%)\<br>1.0(15.88%) | 0.0(91.76%)\<br>1.0(8.24%)  | <0.001  |
| External<br>checkup  | BT        | 36.53±0.25                  | 36.50±0.24                  | 36.53±0.25                  | <0.001  | 36.51±0.25                  | 36.48±0.25                  | 36.51±0.25                  | <0.001  |
|                      | Dentition | 0.0(55.71%)\<br>1.0(44.29%) | 0.0(23.01%)\<br>1.0(76.99%) | 0.0(57.21%)\<br>1.0(42.79%) | <0.001  | 0.0(54.21%)\1<br>.0(45.79%) | 1.0(77.78%)\<br>0.0(22.22%) | 0.0(56.55%)\<br>1.0(43.45%) | <0.001  |
| Laboratory<br>values | FBG       | 5.40±1.35                   | 6.14±2.34                   | 5.37±1.27                   | <0.001  | 5.39±1.29                   | 6.25±2.43                   | 5.33±1.14                   | <0.001  |
|                      | PLT       | 205.14±62.17                | 189.41±60.9                 | 205.86±62.1                 | <0.001  | 212.52±64.79                | 204.93±64.7                 | 213.08±64.7                 | <0.001  |
|                      | BUN       | 5.80±2.68                   | 6.10±2.57                   | 5.79±2.68                   | <0.001  | 5.41±2.54                   | 5.79±2.34                   | 5.38±2.55                   | <0.001  |
|                      | ECG       | 1.0(50.57%)\<br>2.0(49.43%) | 1.0(29.1%)\2<br>.0(70.9%)   | 1.0(51.56%)\<br>2.0(48.44%) | <0.001  | 1.0(56.12%)\2<br>.0(43.88%) | 2.0(65.65%)\<br>1.0(34.35%) | 1.0(57.72%)\<br>2.0(42.28%) | <0.001  |



**Supplementary Table 7.** Univariate analysis for the physical examination features in external dataset

| Category             | Features  | Male                        |                             |                             |         | Female                      |                             |                             |         |
|----------------------|-----------|-----------------------------|-----------------------------|-----------------------------|---------|-----------------------------|-----------------------------|-----------------------------|---------|
|                      |           | Total<br>(n=)               | CHD<br>(n=2027)             | Health<br>(n=42715)         | P-value | Total<br>(n=)               | CHD<br>(n=3680)             | Health<br>(n=47452)         | P-value |
| Demographics         | Age       | 61.01±13.59                 | 70.24±8.35                  | 60.57±13.63                 | <0.001  | 59.31±13.63                 | 69.76±8.56                  | 58.50±13.62                 | <0.001  |
|                      | WHtR      | 0.51±0.05                   | 0.53±0.06                   | 0.50±0.05                   | <0.001  | 0.53±0.06                   | 0.57±0.07                   | 0.53±0.06                   | <0.01   |
| Vital signs          | MSP       | 125.47±14.65                | 136.28±19.02                | 124.95±14.21                | <0.001  | 123.04±15.90                | 136.70±19.86                | 121.99±15.04                | <0.001  |
|                      | Symptom   | 0.0(88.08%)\1.0<br>(11.92%) | 0.0(88.62%)\1<br>.0(11.38%) | 0.0(76.62%)\1<br>.0(23.38%) | <0.001  | 0.0(87.59%)\1<br>.0(12.41%) | 0.0(88.42%)\1<br>.0(11.58%) | 0.0(77.01%)\1<br>.0(22.99%) | <0.001  |
| External<br>checkup  | BT        | 36.58±0.25                  | 36.57±0.27                  | 36.59±0.25                  | <0.001  | 36.58±0.25                  | 36.55±0.25                  | 36.58±0.25                  | <0.001  |
|                      | Dentition | 1.0(52.85%)\0.0<br>(47.15%) | 1.0(51.68%)\0<br>.0(48.32%) | 1.0(77.55%)\0<br>.0(22.45%) | <0.001  | 1.0(53.93%)\0<br>.0(46.07%) | 1.0(52.11%)\0<br>.0(47.89%) | 1.0(77.39%)\0<br>.0(22.61%) | <0.001  |
| Laboratory<br>values | FBG       | 5.43±1.39                   | 6.01±2.40                   | 5.40±1.32                   | <0.001  | 5.39±1.39                   | 6.26±2.67                   | 5.32±1.21                   | <0.001  |
|                      | PLT       | 202.14±55.61                | 197.87±58.17                | 202.34±55.48                | <0.001  | 210.57±57.25                | 206.74±58.46                | 210.87±57.14                | <0.001  |
|                      | BUN       | 6.01±2.35                   | 6.17±2.38                   | 6.00±2.35                   | <0.001  | 5.52±2.25                   | 5.89±2.05                   | 5.49±2.26                   | <0.001  |
|                      | ECG       | 2.0(52.43%)\1.0<br>(47.57%) | 2.0(51.2%)\1<br>0(48.8%)    | 2.0(78.24%)\1<br>.0(21.76%) | <0.001  | 1.0(53.63%)\2<br>.0(46.37%) | 1.0(55.62%)\2<br>.0(44.38%) | 2.0(72.07%)\1<br>.0(27.93%) | <0.001  |

---

**Supplementary Table 8.** IFS results for symptom characteristics

---

| Features                   | IFS AUC       |
|----------------------------|---------------|
| <b>Headache</b>            | <b>0.6222</b> |
| <b>Dizzy</b>               | <b>0.6231</b> |
| <b>Heart palpitations.</b> | <b>0.6253</b> |
| <b>Chest distress</b>      | <b>0.6264</b> |
| Chest pain                 | 0.6235        |
| Chronic cough              | 0.6233        |
| Coughing up phlegm         | 0.6291        |
| Dyspnea                    | 0.6292        |
| Drink more                 | 0.6295        |
| Urine more                 | 0.6294        |
| Weight loss                | 0.6305        |
| Fatigue                    | 0.6304        |
| Pain in the joints         | 0.6340        |
| Blurred vision             | 0.6347        |
| Hands and feet numbness    | 0.6348        |
| Urgency                    | 0.6350        |
| The urine pain             | 0.6351        |
| Constipation               | 0.6351        |
| Diarrhea                   | 0.6352        |
| Nausea and vomiting        | 0.6358        |
| Blurred vision             | 0.6370        |
| Tinnitus                   | 0.6361        |
| Breast pain                | 0.6361        |

---

**Supplementary Table 9.** Each model parameter in the CHD risk assessment model and scorecard

| CHD risk assessment model          |                             |                                | CHD risk score card         |
|------------------------------------|-----------------------------|--------------------------------|-----------------------------|
| FCN                                | LR                          | XGBOOST                        | LR                          |
| 'layer1_in_features': 10           | 'C': 1                      | 'base_score': 0.5              | 'C': 1                      |
| 'layer1_out_features': 7           | 'class_weight': 0: 1, 1: 16 | 'booster': 'gbtree'            | 'class_weight': 0: 1, 1: 16 |
| 'layer1_bias': True                | 'dual': False               | 'colsample_bylevel': 1         | 'dual': False               |
| 'layer1_forward_function': Relu    | 'fit_intercept': True       | 'colsample_bynode': 1          | 'fit_intercept': True       |
| 'layer2_in_features': 7            | 'intercept_scaling': 1      | 'colsample_bytrees': 1         | 'intercept_scaling': 1      |
| 'layer2_out_features': 4           | 'l1_ratio': None            | 'gamma': 0                     | 'l1_ratio': None            |
| 'layer2_bias': True                | 'max_iter': 1000            | 'learning_rate': 0.00100000005 | 'max_iter': 1000            |
| 'layer2_forward_function': Relu    | 'multi_class': 'auto'       | 'max_delta_step': 0            | 'multi_class': 'auto'       |
| 'layer3_in_features': 4            | 'n_jobs': None              | 'max_depth': 6                 | 'n_jobs': None              |
| 'layer3_out_features': 2           | 'penalty': 'l1'             | 'min_child_weight': 1          | 'penalty': 'l1'             |
| 'layer3_bias': True                | 'random_state': 10          | 'missing': None                | 'random_state': 10          |
| 'layer3_forward_function': Softmax | 'solver': 'liblinear'       | 'n_estimators': 200            | 'solver': 'liblinear'       |
| 'layer2_bias': True                | 'tol': 0.0001               | 'n_jobs': 8                    | 'tol': 0.0001               |
| 'layer4_in_features': 2            | 'verbose': 0                | 'nthread': None                | 'verbose': 0                |
| 'layer4_out_features': 1           | 'warm_start': False         | 'objective': 'binary:logistic' | 'warm_start': False         |
| 'layer4_bias': True                |                             | 'random_state': 15             | LR                          |
| 'layer4_forward_function': Softmax |                             | 'reg_alpha': 0                 | 'C': 1                      |
|                                    |                             | 'reg_lambda': 1                | 'class_weight': 0: 1, 1: 16 |
|                                    |                             | 'scale_pos_weight': 12         | 'dual': False               |
|                                    |                             | 'seed': None                   |                             |
|                                    |                             | 'silent': None                 |                             |
|                                    |                             | 'subsample': 1                 |                             |
|                                    |                             | 'verbosity': None              |                             |
|                                    |                             | 'eta': 0.01                    |                             |

---

**Supplementary Table 10.** Coefficients of CHD risk scorecard models established by logistic regression

---

|    | Features     | Male        | Female      |
|----|--------------|-------------|-------------|
| 1  | FBG          | -0.66433192 | -0.69315899 |
| 2  | Age          | -0.82118255 | -0.80446091 |
| 3  | MSP          | -0.60222084 | -0.59610749 |
| 4  | WHtR         | -0.7864424  | -0.63151727 |
| 5  | PLT          | -0.52356847 | -0.56922886 |
| 6  | BT           | -0.66301309 | -0.76229746 |
| 7  | BUN          | -0.5267144  | -0.35161862 |
| 8  | Dentition    | -0.94089105 | -0.98428877 |
| 9  | ECG          | -0.56541145 | -0.67876396 |
| 10 | Symptom      | 0.90768298  | -0.89953396 |
| 11 | lr.intercept | -0.31115537 | 0.11055879  |

---

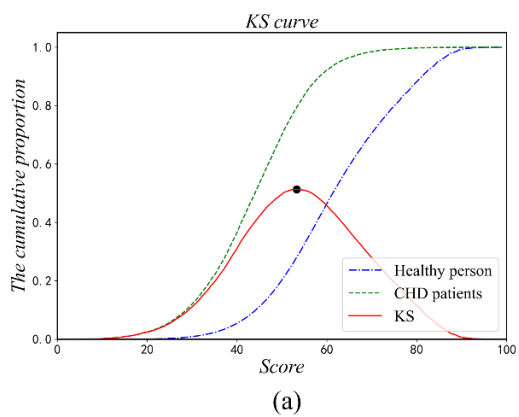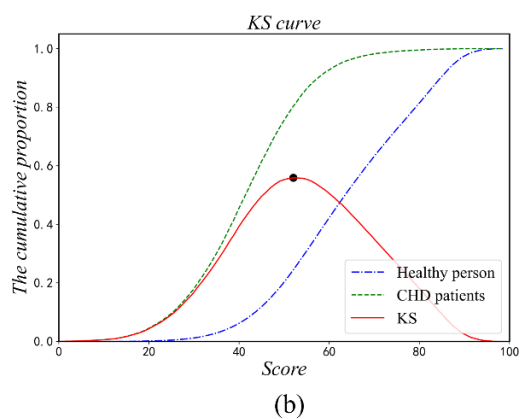

**Supplementary Fig. 1:** KS curve for CHD risk scorecard: (a) KS curve for male, (b) KS curve for female.

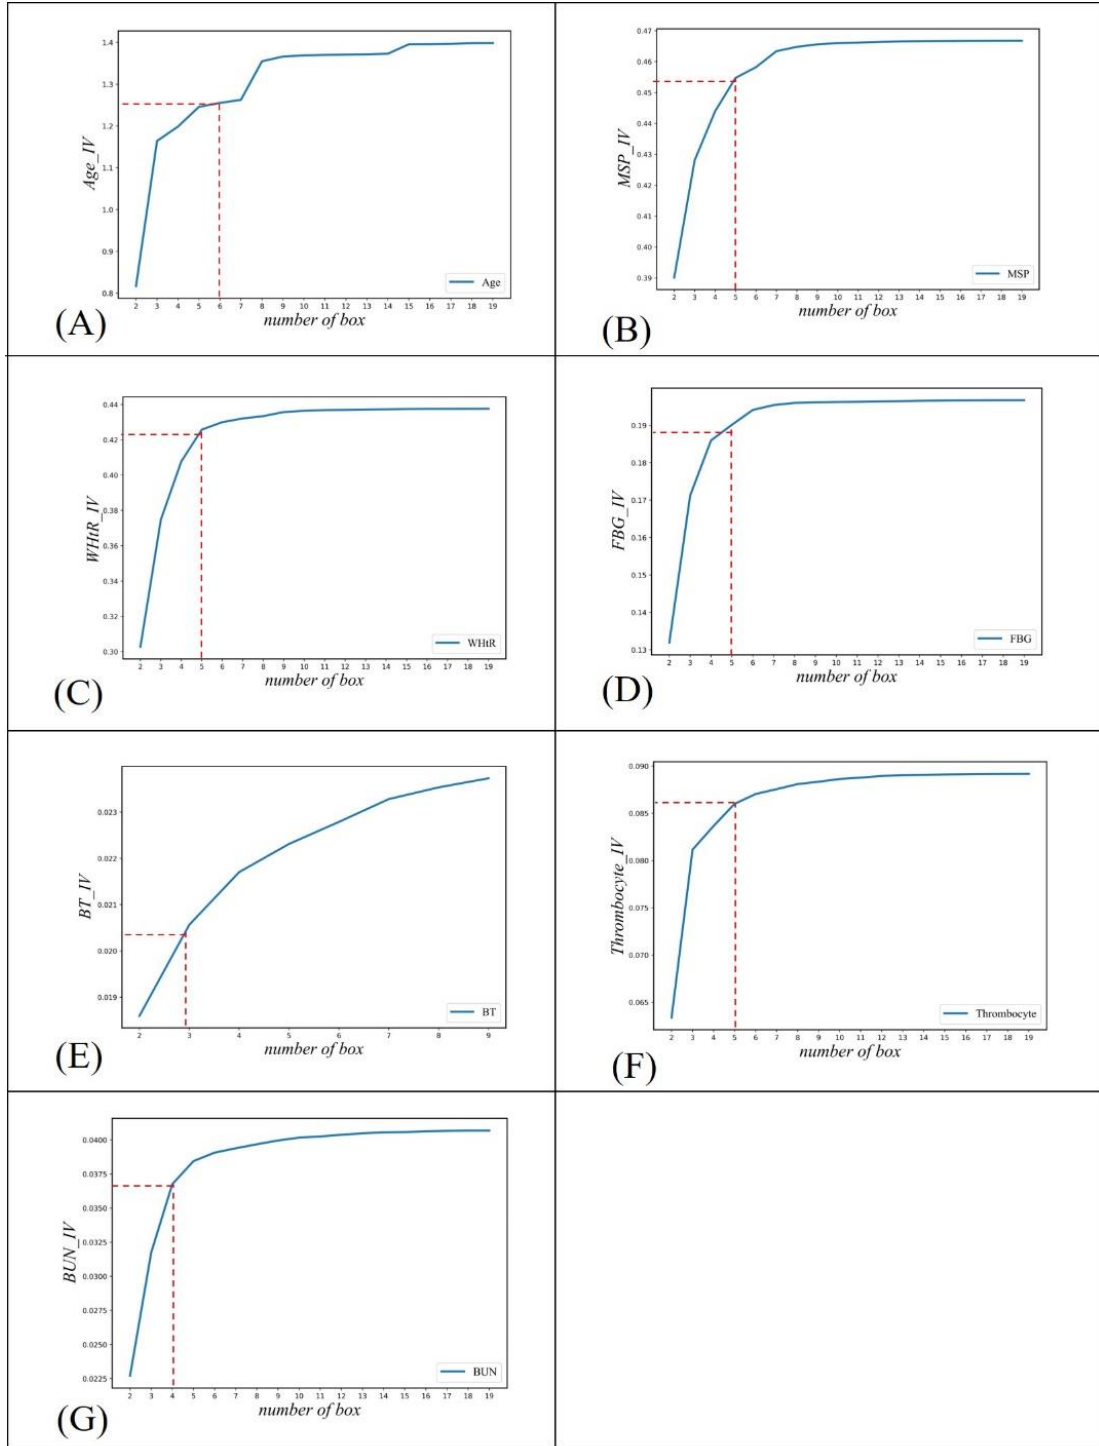

**Supplementary Fig. 2:** IV values for male continuous features under each bin

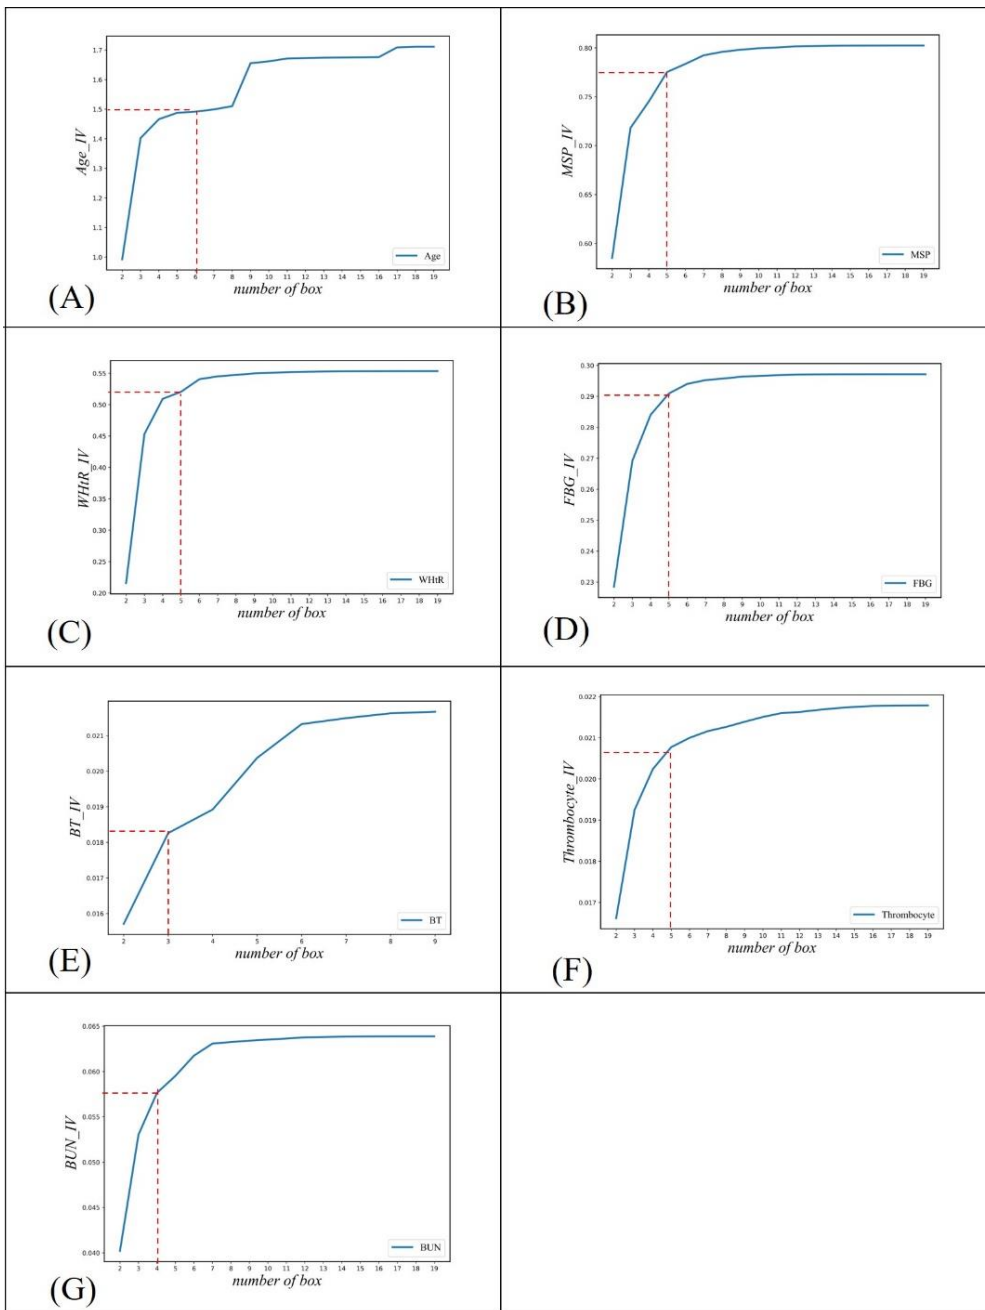

**Supplementary Fig. 3: IV values for female continuous features under each bin.**
